21 **Abstract**

22 Covert visual attention is accomplished by a cascade of mechanisms distributed across  
23 multiple brain regions. Recent studies in primates suggest a parcellation in which visual  
24 cortex is associated with enhanced representations of relevant stimuli, whereas  
25 subcortical circuits are associated with selection of visual targets and suppression of  
26 distractors. Here we identified how neuronal activity in the superior colliculus (SC) of  
27 head-fixed mice is modulated during covert visual attention. We found that spatial cues  
28 modulated both firing rate and spike-count correlations, and that the cue-related  
29 modulation in firing rate was due to enhancement of activity at the cued spatial location  
30 rather than suppression at the uncued location. This modulation improved the neuronal  
31 discriminability of visual-change-evoked activity between contralateral and ipsilateral SC  
32 neurons. Together, our findings indicate that neurons in the mouse SC contribute to  
33 covert visual selective attention by biasing processing in favor of locations expected to  
34 contain relevant information.

## 35 **Introduction**

36           Visual selective attention is the ability to selectively process relevant stimuli and  
37 ignore irrelevant distractors, and is achieved through a distributed network of brain  
38 areas that includes both cortical and subcortical areas. Our understanding of the  
39 neuronal mechanisms of visual selective attention so far mainly comes from  
40 neurophysiological studies in non-human primates that manipulate attention using  
41 informative cues. For instance, cortical neurons, including those in the visual cortex<sup>1</sup>,  
42 frontal<sup>2</sup> and parietal cortices<sup>3</sup>, display cue-related modulation of their visual responses  
43 during selective attention tasks. The main features of cue-related modulation in cortical  
44 neurons include increases in firing rate<sup>4</sup> in favor of the cued stimulus and changes in the  
45 correlated variability of neuronal ensembles<sup>5</sup>, both of which can affect the decoding of  
46 visual information. Subcortical areas are also involved in selective attention, either in  
47 parallel or in conjunction with cortical mechanisms. Neurons in primate superior  
48 colliculus<sup>6</sup>, thalamus<sup>7,8</sup> and caudate nucleus of the basal ganglia<sup>9</sup> also display cue-  
49 related modulation during visual selective attention tasks. In contrast to cortical  
50 mechanisms that appear to regulate the quality of local visual processing, subcortical  
51 circuits have been implicated in the spatial weighting of visual signals<sup>10</sup> and the  
52 suppression of distractors<sup>11,12</sup> during perceptual tasks.

53           The mouse has emerged as a promising model for studying the neuronal  
54 mechanisms of visual selective attention, because the genetic tools available in mice  
55 provide unparalleled opportunities to study selective attention at molecular, genetic,  
56 cellular and circuit levels. Complementing these tools, several behavioral studies over  
57 the last few years have demonstrated the feasibility of studying visual selective attention

58 in mice, both in head-fixed<sup>13,14</sup> and freely moving<sup>15</sup> preparations. Notably, we recently  
59 reported that mice display perceptual benefits from informative spatial cues – a well-  
60 known attentional effect – in three different visual spatial attention tasks typically used in  
61 primates<sup>13</sup>. These efforts pave the way for further investigating the neuronal  
62 mechanisms of visual selective attention in mice using experimental approaches that  
63 are not yet readily available in primates. For instance, optogenetic manipulation of the  
64 basal ganglia “direct pathway” in mice during spatial attention tasks has revealed a  
65 circuit that biases visual processing in favor of the cued visual location<sup>16</sup>. In the visual  
66 cortex of mice, results from a visual attention task have identified subthreshold  
67 membrane dynamics that depend on the spatial-cue context<sup>14</sup>.

68         The midbrain superior colliculus is a crucial subcortical structure for the control of  
69 visual selective attention in several species<sup>10,17</sup> but the role of the mouse SC in selective  
70 attention has not yet been established. Since the SC has direct or indirect connections  
71 with all known brain areas involved in attention, understanding what and how the SC  
72 contributes to visual selective attention could be a linchpin for understanding the overall  
73 circuit mechanisms. On the other hand, studies of mouse SC visual functions have  
74 largely focused on visuomotor processing related to innate visual behaviors, such as  
75 predator avoidance or prey approach<sup>18</sup>. We recently reported that inhibiting visually  
76 evoked SC activity in mice impairs their voluntary visual perceptual choices, and that  
77 the perceptual impairment was larger when a competing visual stimulus was present<sup>19</sup>,  
78 consistent with a role of the mouse SC in visual selection<sup>20</sup>. However, the involvement  
79 of the mouse SC in visual selective attention itself has not yet been explicitly tested. It is  
80 possible that the mouse SC is involved in prioritizing the representation of expected

81 stimuli, or suppressing the distractors; alternatively, the mouse SC might simply be  
82 involved in the early processing of visual events. To distinguish among these  
83 hypotheses, it is crucial to investigate how SC neuronal activity is modulated during  
84 visual selective attention tasks.

85         Here we investigated the neuronal correlates of visual selective attention in the  
86 mouse SC by recording the spiking activity of neurons during a visual orientation  
87 change-detection task and using spatial cues to manipulate the allocation of selective  
88 attention. We found that visually evoked activity in the mouse SC displayed cue-related  
89 modulation, including changes in spike rate and interneuronal spike-count correlations.  
90 By comparing activity across attention task conditions, we determined that the cue-  
91 related modulation was the result of enhancement at the cued spatial location rather  
92 than suppression at the uncued location. Together, our results demonstrate that  
93 neurons in the mouse SC are involved in visual selective attention, and that SC neurons  
94 can contribute to attention by biasing signal processing in favor of spatial locations  
95 expected to contain behaviorally relevant events.

96

## 97 **Results**

98           To investigate cue-related modulation of mouse SC neuronal activity, we  
99 recorded the activity of SC neurons in two variants of a spatial cueing task. The main  
100 task, which we term “contra/ipsi cue”, was similar to one we used previously<sup>13,21</sup>. In  
101 brief, head-fixed mice viewed stimuli on a pair of lateralized displays while running on a  
102 wheel. The animals’ locomotion controlled each trial’s progression through several  
103 epochs defined by visual stimulus events (Fig. 1a). Presentation of a single lateralized  
104 Gabor patch served as a spatial cue, indicating the potential location of an upcoming  
105 orientation change, and defined the start of the “cue epoch”. The appearance of a  
106 second Gabor patch in the opposite visual hemifield marked the start of the “2-patch  
107 epoch”, throughout which both Gabor patches remained present. In trials with an  
108 orientation change (50% of trials), the start of the “change epoch” was marked by a tilt  
109 in orientation of the cue patch. Mice were required to lick a center spout within a 500 ms  
110 response window to indicate their detection of the orientation change and receive a  
111 liquid reward. Each session was organized into alternating sub-blocks of 40 left-cue and  
112 40 right-cue trials. We used this version of the task to characterize the spatial specificity  
113 and time course of cue-related modulation in mouse SC neurons (n = 94 sessions). In a  
114 subset of sessions (n = 25) we also recorded SC neuronal activity in a variant of the  
115 main task that included sub-blocks of 80 no-cue trials interleaved with left-cue and right-  
116 cue sub-blocks; accordingly, we refer to this variant as the “cue/no-cue” task.

117           Extracellular activity was recorded from SC neurons located at least 400  $\mu\text{m}$   
118 below the dorsal surface of SC with moveable chronic 16-channel microwire bundles. At  
119 these depths, recorded neurons were located in the intermediate and deep layers of

120 SC. For the purpose of documenting neuronal activity related to the visual attention  
121 task, we analyzed the activity of 311 / 481 SC neurons with clear visual spatial receptive  
122 fields that overlapped the location of the contralateral visual stimulus (Fig. S1).

123

#### 124 *SC neuronal responses to visual events and modulation by spatial cue location*

125 In addition to exhibiting phasic activity for stimulus-onset and orientation-change  
126 events, many SC neurons displayed cue-related modulation during multiple epochs of  
127 the attention task. The results from a sample unit illustrate the pattern observed across  
128 the population of SC neurons during the “contra/ipsi cue” task (Fig. 1b). Prior to cue  
129 onset, many neurons displayed tonic activity (population mean spike count within a 200  
130 ms interval before cue onset:  $2.39 \pm 0.33$ , mean  $\pm$  95% confidence interval [CI]), and  
131 most neurons (79%, 247/311, see Methods) were not modulated by the location of the  
132 spatial cue (Fig. 1c), even though the neurons were recorded during sub-blocks of 40  
133 consecutive trials with the same cue location. The onset of the spatial cue caused a  
134 phasic increase of activity in most neurons (81%, 251/311, significant units, see  
135 Methods) when it was presented contralaterally (contra-cue), and a small decrease  
136 when presented ipsilaterally (ipsi-cue). The onset of the second Gabor patch had a  
137 similar effect, causing a phasic increase in activity when presented contralaterally in  
138 ipsi-cue trials and a decrease when presented ipsilaterally in contra-cue trials.

139 Following these onset transients, neuronal activity in contra-cue trials gradually  
140 increased, on average exceeding activity in ipsi-cue trials ~250 ms after the start of the  
141 2-patch epoch and remaining elevated throughout the remainder of the task epoch. We  
142 identified this elevation of neuronal activity in contra-cue trials compared to ipsi-cue

143 trials during the latter half of the 2-patch epoch as cue-related modulation for two  
144 reasons. First, the visual stimuli presented during this interval of the two trials types  
145 were identical, so the elevation in activity in the 2-patch epoch depended on the location  
146 of the spatial cue presented in the preceding epoch. Second, this cue-related  
147 modulation was not a result of lingering visual responses caused by the preceding cue,  
148 because it emerged gradually over time during the 2-patch epoch on a time scale that  
149 anticipated the possible visual change event.

150         After the near-threshold change in orientation, many SC neurons (35%, 108 /  
151 311) exhibited robust transient increases in activity for changes in the contralateral  
152 visual field and modest slower reductions in activity for changes in the ipsilateral visual  
153 field (Fig. 1b,c, right panels). Note that these change-related increases and decreases  
154 in SC activity were superimposed on different baseline levels of neuronal activity,  
155 because of the differences in cue-related modulation during the preceding 2-patch  
156 epoch.

157         To quantify cue-related modulation, we used the receiver operating characteristic  
158 (ROC) approach from signal detection theory<sup>22</sup>. We computed the area under the ROC  
159 curve (auROC) by comparing spike rates in ipsi-cue trials (“signal absent”) to spike  
160 rates in contra-cue trials (“signal present”) in consecutive non-overlapping 20 ms bins  
161 (Fig. 1d). The average auROC across our population of SC neurons indicates that  
162 before cue onset, the spike rates of SC neurons did not differentiate between contra-  
163 cue and ipsi-cue trial types ( $p > 0.1$  in all bins within 200 ms, one-tailed Wilcoxon  
164 Signed rank test for population auROC). Rather, the spike rates on contra-cue trials  
165 started to become higher than ipsi-cue trials at 220 ms after the onset of the 2-patch



166 epoch ( $p < 0.05$ , one-tailed Wilcoxon Signed rank test on population auROC values)  
167 and remained significant throughout the rest of the epoch. These results demonstrate  
168 that, even though spatial cue information was available throughout the sub-block of  
169 trials, cue-related modulation of SC neurons emerged only after the visual cue stimuli  
170 were presented.

171 Attention-related neuronal modulation is often documented during a “delay-  
172 period”, an epoch during attention tasks after the transient effects of stimulus onsets  
173 have waned, during which the sustained modulatory effects of attention can be  
174 assessed on otherwise tonic neuronal activity. In our experiments, we defined the “delay  
175 period” as the final 200 ms of the 2-patch epoch, when mice viewed the two Gabor  
176 patches and waited for a potential orientation change to occur. Across our sample of SC  
177 units, the attention modulation during the delay period measured by auROC was  
178 significantly larger than the chance (0.5) level ( $p < 10^{-15}$ , one-tailed Wilcoxon Signed  
179 rank test, Fig. 2a), indicating that at the population level mouse SC neurons have higher  
180 spike rates in contra-cue trials than ipsi-cue trials during this interval (37%, 115/311 of  
181 total units show auROC values significantly  $> 0.5$ , bootstrapped 95% CI  $> 0.5$ ).  
182 Similarly, the distribution of delay period attentional modulation indices, the other widely  
183 used measurement of attention related modulation of neuronal activity, supports the  
184 same conclusion (Fig. 2b). These results demonstrate that mouse SC neuronal activity  
185 displays a classic hallmark of attention-related modulation.

186 In addition to modulation of spike rate, spatial cueing can also influence the  
187 information available in neuronal populations through effects on the structure of  
188 correlated variability amongst neurons<sup>5,23</sup>. To assess how the correlated variability

189 amongst mouse SC neurons was modulated by spatial cueing, we computed spike  
190 count (“noise”) correlations during the delay period of contra-cue trials and ipsi-cue trials  
191 in simultaneously recorded neuronal pairs (n = 203 pairs). As shown in Fig. 2c-d, the  
192 distribution of spike-count correlations across pairs of mouse SC neurons was broad  
193 (standard deviation for contra-cue = 0.196; ipsi-cue = 0.198) and on average positive  
194 (mean for contra-cue = 0.084; ipsi-cue = 0.116). Notably, spike-count correlations in  
195 contra-cue trials (median = 0.079) were significantly smaller than those in ipsi-cue trials  
196 (median = 0.104), indicating that the degree of correlated variability among mouse SC  
197 neurons was reduced when mice awaited a potential visual event that might occur in  
198 their receptive fields. This result indicates that spatial cueing can potentially alter  
199 information available in mouse SC neuronal populations by reducing correlated  
200 variability.

201       Because several other factors might also contribute to the modulation of mouse  
202 SC neuronal activity during our attention task, including behavioral states and  
203 locomotion<sup>24,25</sup>, we sought to compare the potential influence of these factors, as well as  
204 the spatial cue condition, on the spike rates of individual SC neurons using linear  
205 regression analysis (Fig. S2). This analysis revealed that some mouse SC neurons  
206 were indeed significantly modulated by running speed (29%, 90/311, significant units,  
207 see Methods) or pupil size (27%, 83/311). However, the influence of these factors on  
208 spike rate was manyfold smaller than that of spatial cue condition, which was the single  
209 largest contributor ( $p < 10^{-9}$  for both Tukey-Kramer post-hoc comparison tests following  
210 one-way ANOVA on linear regression coefficients) to variation in spike rate during the

211 delay period. These results reinforce our conclusion that spatial cue information was  
212 specifically important in modulating SC neurons during the visual attention task.

213

214 *Cue-related modulation results from enhanced activity at the location of expected visual*  
215 *events*

216 The difference in spike rate we observed between contra-cue and ipsi-cue trials  
217 during the delay period could be due to enhancement of processing at the spatial  
218 location expected to contain behaviorally relevant information, or suppression of activity  
219 at locations not expected to contain such information, or a combination of both effects.  
220 Distinguishing between these possibilities is important for determining the underlying  
221 circuit mechanisms of selective attention operating amongst our SC neurons.

222 To address this point, we used a “cue/no-cue” variant of our attention task<sup>13</sup> that  
223 allowed us to compare SC neuronal activity evoked by cued and uncued stimuli to  
224 activity evoked by identical visual stimuli but presented in a context with no spatial  
225 cueing. For the no-cue trials in these experiments, the cue-epoch was replaced with  
226 pink noise and then followed by our standard 2-patch epoch (Fig. 3a). Orientation  
227 changes in these no-cue trials occurred in pseudorandom order on the left or right side  
228 with equal frequency. Left-cue, right-cue, and no-cue trials were organized as  
229 interleaved sub-blocks.

230 We first verified that providing the spatial cue improved behavioral performance.  
231 Perceptual sensitivity, measured using the behavioral metric  $d'$  from signal detection  
232 theory, was significantly higher on with-cue trials compared to no-cue trials (with-cue:  
233  $1.64 \pm 0.11$ , mean  $\pm$  SEM; no-cue:  $1.36 \pm 0.11$ ,  $p < 0.001$ , Wilcoxon signed rank test),

234 consistent with our previous results<sup>13</sup>. The decision criterion was also significantly  
235 different, shifting in favor of the cued location on trials when spatial cueing was provided  
236 (with cue:  $-0.36 \pm 0.11$ ; no-cue:  $-0.15 \pm 0.13$ ,  $p = 0.004$ ).

237 At the neuronal level, we found clear evidence that cue-related modulation in the  
238 mouse SC was the result of enhancement at the cued location, with little or no  
239 suppression at the uncued location. As expected, given the cueing conditions, SC  
240 activity in the contra-cue and ipsi-cue trials during the “cue/no-cue” task (Fig. 3b)  
241 recapitulated the cue-related modulation found during the “contra/ipsi cue” task (Fig.  
242 1c). The novel finding from this set of experiments was that activity in the no-cue trials  
243 (thin gray line in Fig. 3b) was not only lower than the activity in the contra-cue trials, it  
244 was nearly identical to the activity in the ipsi-cue trials. The only exceptions were the  
245 transient differences after the onset of the cue and the occurrence of the contralateral  
246 change, which would be expected given the difference in visual stimulus conditions at  
247 those points in the trial.

248 To document the time course of these cue-related effects, we again computed  
249 spike rate auROC values in consecutive 20 ms bins (Fig. 3c), separately comparing  
250 contra-cue and ipsi-cue to the no-cue condition. Before the onset of the cue epoch,  
251 neither comparison showed average auROC values significantly different from the  
252 chance level ( $p > 0.05$  in all bins within -200 ms to 0 ms interval, one-tailed Wilcoxon  
253 Signed rank test on population auROC values), consistent with our findings in the  
254 “contra/ipsi cue” dataset that cue-related modulation was not present before the start of  
255 each trial. The average auROC values for contra-cue versus no-cue became  
256 significantly greater than chance at 240 ms after the onset of the 2-patch epoch ( $p <$

257 0.05, one-tailed Wilcoxon Signed rank test on population auROC values) and remained  
258 significantly elevated for the duration of the epoch, indicating a sustained enhancement  
259 of activity at the cued location. In contrast, the auROC values for ipsi-cue versus no-cue  
260 trials were not different from chance in any time bin after 120 ms during the 2-patch  
261 epoch, demonstrating that cueing did not produce suppression at the uncued location.

262 Finally, we examined delay period neuronal modulation in the “cue/no-cue” task  
263 variant. We computed individual SC neuron auROC values during the final 200 ms of  
264 the 2-patch epoch (“delay period”), and found the distribution to be significantly greater  
265 than chance when comparing contra-cue to no-cue ( $p=0.0011$ , one-tailed Wilcoxon  
266 Signed rank test, Fig. 3d), but not different from chance when comparing ipsi-cue to no-  
267 cue ( $p = 0.87$ , Fig. 3e). We found the same pattern of results when we quantified  
268 population cueing effects with an attention modulation index (AMI) rather than auROC  
269 (contra-cue vs no-cue:  $0.036 \pm 0.019$ ,  $p = 0.006$ , one-tailed Wilcoxon signed rank test;  
270 ipsi-cue vs no-cue:  $-0.004 \pm 0.016$ ,  $p = 0.71$ ).

271 Together, these results demonstrate that the cue-related modulation observed in  
272 mouse SC neurons was due to the enhancement of processing at the cued spatial  
273 location rather than suppression at the uncued location.

274

### 275 *Cue-related modulation improves SC neuronal discriminability of visual events*

276 Having established that spatial cues enhanced mouse SC neuronal activity  
277 specifically at the cued location, we next examined how cueing influenced neuronal  
278 activity evoked by the behaviorally relevant stimulus event. We recently found that  
279 unilateral suppression of SC neuronal activity in a short time interval immediately after

280 the visual orientation change caused major deficits in the ability of mice to correctly  
281 detect these near-threshold visual events<sup>19</sup>. Given that SC neuronal activity appears to  
282 be crucial for this detection task, we sought to identify how the effects of spatial cueing  
283 on SC neurons might contribute to the observed improvements in task performance  
284 during “cue/no-cue” experiment.

285 One possibility is that spatial cueing improves the ability of mouse SC neurons to  
286 discriminate between change and no-change events at the cued location, as has been  
287 observed in primate visual cortex<sup>26</sup>. However, we found no evidence that spatial cueing  
288 affected the neuronal discriminability for contralateral events. We computed auROC  
289 values for a “change” window (150 ms interval beginning 60 ms after the change, or a  
290 matched interval in trials with no change; see Methods) by comparing spike counts in  
291 change versus no-change trials, separately for contra-cue and no-cue trials. There was  
292 no significant difference between the average auROC values of the contra-cue condition  
293 compared to no-cue ( $p = 0.82$ , two-tailed Wilcoxon Signed rank test), despite the fact  
294 that the spike counts in contra-cue change trials were significantly higher than those in  
295 no-cue change trials ( $p = 0.03$ , one-tailed Wilcoxon Signed rank test).

296 Another possibility is that spatial cueing improves the ability of SC neurons to  
297 discriminate change events in the contralateral visual field, relative to SC neuronal  
298 activity occurring at the same time in the other SC (Fig. 4a), as has been observed in  
299 primate SC<sup>27</sup>. To test this, we used unilateral recordings of SC activity obtained  
300 separately during contralateral and ipsilateral orientation changes as a proxy for  
301 simultaneous bilateral recordings during contralateral change events (Fig. 4b, d). We  
302 again computed auROC values for the “change” window, comparing contra-change and

303 ipsi-change spike counts, separately for the cued and no-cue trials. This analysis  
304 revealed that auROC values were significantly higher in cued trials compared to no-cue  
305 trials ( $p = 0.0045$ , Fig. 4c, e). In addition, a larger proportion of SC neurons displayed  
306 significant auROC values (bootstrapped 95% CI  $\not\subset 0.5$ ) in cued trials than in no-cue trials  
307 ( $\chi$ -square test;  $p = 0.009$ ). Therefore, spatial cueing significantly improved SC neuronal  
308 discriminability when the relative levels of activity in the two colliculi were taken into  
309 consideration.

310       Together, these results demonstrate that cue-related modulation in the mouse  
311 does not necessarily increase the ability of SC neurons to locally discriminate between  
312 change and no-change events, but instead enhances activity at the cued location so  
313 that neuronal discriminability is improved when comparing activity across both sides of  
314 the SC.

315

316

## 317 **Discussion**

318           Our study reveals that neurons in the mouse SC display cue-related modulation  
319 during a covert visual selective attention task – notably, the perceptual benefits from  
320 spatial cueing were confirmed by improvements in detection of a near-threshold visual  
321 change. The cue-related modulation emerged after the spatial cue stimulus was  
322 presented and persisted through the visual target event, consistent with the time course  
323 of attention allocation in other species<sup>28,29</sup>. The main feature of cue-related modulation  
324 was an increase in the spike rates of SC neurons when the mouse was cued to attend  
325 the contralateral visual field, consistent with the retinotopic representation in the SC<sup>30</sup>. In  
326 addition to effects on spike rate, the average spike count correlations between pairs of  
327 SC neurons were also lower with contralateral spatial cues. Furthermore, by comparing  
328 activity across attentional conditions, we determined that the cue-related modulation  
329 was due to enhancement of SC activity at the cued location rather than suppression of  
330 SC activity at the uncued location.

331           Our results identify how neurons in the mouse SC can contribute to the  
332 mechanisms of visual selective attention – their spiking activity is selectively elevated  
333 with spatial cueing so that the processing of visual information is biased in favor of  
334 spatial locations expected to contain relevant information. This biasing of SC activity  
335 does not alter the local neuronal discriminability of visual events, and hence would not  
336 improve performance if activity from only one side or region of the SC were used to  
337 guide detection performance. Instead, this biasing enhances the difference in activity  
338 between the cued location and locations represented elsewhere in the SC, thereby  
339 improving neuronal discriminability of the relevant event if the readout mechanism



340 involved a bilateral or global comparison of activity across the entire SC, consistent with  
341 previous results in the primate<sup>27</sup>.

342 Stimulus competition is an important aspect of visual selective attention and the  
343 SC plays a crucial role in selecting target stimuli amongst competing distractors in many  
344 species<sup>17,20,31</sup>, presumably reflecting an evolutionarily conserved midbrain function<sup>32,33</sup>.  
345 In the primate, SC activity is modulated in a variety of paradigms that involve stimulus  
346 selection, including the selection of targets for orienting movements<sup>34,35</sup> and also  
347 selection of visual stimuli in the absence of orienting movements<sup>6,36</sup>. This modulation is  
348 an indicator of the biased competition between the alternative stimuli that unfolds before  
349 the subject's response and that is usually settled in favor of the cued stimulus. Further  
350 evidence of this competition has been provided by causal manipulations of SC activity  
351 which, by artificially increasing or decreasing SC for one of the stimulus locations, can  
352 cause major changes in which alternative the subject selects<sup>12,37,38</sup>. The fact that we  
353 found comparable enhancement of SC spiking activity in favor of the cued stimulus in  
354 our covert attention tasks suggests that similar competitive mechanisms also apply to  
355 the mouse SC.

356 However, the particular competitive mechanism that would explain our results is  
357 somewhat unexpected. There is compelling evidence that inhibitory feedback circuits to  
358 the SC (or optic tectum) play a key role in implementing stimulus selection, and these  
359 involve strong suppression of non-cued locations across the SC map<sup>17,39</sup>. Our pattern of  
360 results indicates that a different mechanism is responsible for the cue-related  
361 modulation of our SC neurons. By interleaving cue and no-cue trials, we determined  
362 that our cue-related modulation was due to enhancement of visual processing at the

363 cued location, rather than suppression at the uncued distractor location. This  
364 enhancement of activity at the cued location – with no change at the uncued location –  
365 is not easily explained by broad inhibitory feedback but would be consistent with a more  
366 focused excitatory or disinhibitory circuit mechanism. For example, we recently  
367 demonstrated that activity through the direct pathway of the basal ganglia is linked to  
368 the allocation of spatial attention<sup>16</sup>; this might involve a disinhibitory mechanism from the  
369 substantia nigra to the SC that would be consistent with our current neuronal data. It is  
370 also possible that other attention task designs, such as those that require actively  
371 ignoring visual stimuli at uncued locations<sup>13</sup>, would reveal evidence for broad inhibition  
372 like that found in previous studies.

373         The logic of the attention mechanism in the SC indicated by our results is  
374 different from that described in visual cortex, because it involves a global comparison  
375 rather than a local improvement in discriminability. In visual cortex, it is thought that a  
376 local improvement of neuronal discriminability through sharpened visual tuning<sup>40</sup>,  
377 changes in receptive field properties<sup>41</sup>, and alterations in the statistical structure of  
378 activity amongst the population of active neurons<sup>5</sup> all contribute to the perceptual  
379 improvements at cued locations during the allocation of attention<sup>26,42</sup>. The lack of cue-  
380 related improvements in local neuronal discriminability of mouse SC neurons in our  
381 results might be related to how their activity is used in the task. Neurons in the SC are  
382 generally not selective to visual features or exhibit much broader tuning than visual  
383 cortical neurons<sup>43</sup>. Thus, the tuning of local pools of SC neurons for visual features  
384 might be less relevant for determining the accuracy of perceptual decisions; instead, the  
385 relative magnitude of event-related activity across the SC retinotopic map might be a

386 much more important factor in setting the limits of detection performance<sup>44</sup>. This  
387 interpretation is consistent with previous studies showing that relative activity across the  
388 SC (or optic tectum) plays a central role in visual selection in fish<sup>45</sup>, birds<sup>46</sup>, and  
389 primates<sup>27</sup>. This type of mechanism is also reminiscent of computational models that  
390 use differential weighting of sensory evidence to explain how spatial cueing can account  
391 for the perceptual improvements during selective attention<sup>47</sup>. Thus, the relative activity  
392 across the SC might be a central component of the mechanism that implements visual  
393 spatial attention.

394         The effect of spatial cueing on interneuronal “noise” correlations we observed in  
395 mouse SC is consistent with previous observations in primate sensory cortical areas,  
396 but likely carries different functional implications. Pairs of neurons in primate visual  
397 cortex often display smaller correlations for cued stimuli than for uncued stimuli<sup>42,48</sup>,  
398 consistent with specific hypotheses about how the correlation structure of neuronal  
399 activity in these visual cortical areas impacts the decoding mechanism used to guide  
400 behavior<sup>49,50</sup>. Outside of cortical sensory areas, the possible importance of the neuronal  
401 correlation structure is less well established but also necessarily depends on how the  
402 neuronal activity is decoded<sup>51,52</sup>. Our hypothesis, that global decoding of SC neurons  
403 supports the detection of behaviorally relevant events, implies a specific relationship  
404 between cue-related modulation of correlations in neuron pairs within and between the  
405 two halves of SC<sup>27</sup>. Future visual attention experiments using simultaneous bilateral  
406 recordings in the mouse SC might help resolve these issues.

407         How SC attentional control interacts with cortical mechanisms of attention  
408 remains to be explored. Besides prominent roles of the SC in early visual processing in

409 mice<sup>53</sup>, outputs from SC could significantly modulate visual cortical activity via visual  
410 thalamus in mice<sup>54-57</sup>. Thus, it is possible that cue-related modulation in the SC may  
411 contribute to cortical correlates of visual attention in mice. On the other hand, how cue-  
412 related modulation influences mouse visual cortical processing remains unclear.  
413 Notably, a recent study found spatial-context-dependent enhancement of visual  
414 processing in the mouse primary visual cortex, using a block-organized visual detection  
415 task with target stimuli that occurred at one of two locations within the same hemifield<sup>14</sup>.  
416 However, no competing distractor stimulus was presented in that study, and it is evident  
417 that attention-related modulation in the primate visual cortex is influenced heavily by  
418 stimulus competition<sup>58,59</sup>. It is unclear how mouse visual cortical activity would be  
419 modulated in attention tasks that include competing visual stimuli, such as ours.

420 In addition to interacting with visual cortical mechanisms, there is also evidence  
421 that the SC can contribute to visual attention through mechanisms that operate further  
422 downstream. In the macaque, SC inactivation causes major deficits in visual attention  
423 performance but without altering the well-known correlates of attention in visual cortex<sup>60</sup>,  
424 indicating that the SC makes its contributions to attention through other cortical or  
425 subcortical regions. The basal ganglia were proposed as a possible candidate, based  
426 on their role in learned associations between visual events and behavioral responses<sup>61</sup>,  
427 and this has been supported by more recent findings. For instance, inactivation of the  
428 primate SC disrupts attention-related modulation of neuronal activity in caudate nucleus  
429 of the striatum<sup>9,62</sup>, together with causing behavioral deficits in spatial attention. In mice,  
430 it has been demonstrated that the dorsomedial striatum, putative homolog of the

431 primate caudate nucleus, is causally involved in visual perceptual choices and visual  
432 selective attention<sup>16,21</sup>.

433         Our knowledge about neuronal mechanisms of visual selective attention in mice  
434 remains far from complete. Nevertheless, our findings demonstrate that the mouse SC  
435 neuronal activity displays a classic hallmark of attention-related modulation observed in  
436 the primate brain, illustrating the utility of the mouse as a model system for dissecting  
437 the neuronal mechanisms of attention. Future studies investigating how the SC, basal  
438 ganglia and cortical circuits interact could provide important insights into how a higher-  
439 order function like selective attention is implemented through the cooperative activity  
440 across these diverse brain regions and circuits.

441

## 442 **Material and Methods**

### 443 Animals

444 All procedures were conducted on wild-type C57BL/6J mice (JAX stock # 000664). The  
445 mice were housed in a 12:12 reversed day-night cycle, with lights off at 9 am, and all  
446 experimental procedures and behavioral training were done in the lights-off portion of  
447 the cycle (9am-9pm). Two male and two female mice weighing 18-25 grams were  
448 surgically implanted at age 6-8 weeks and then used in experiments for up to ~9  
449 months. All the mice were in group housing (2-4 cage mates) prior to the surgical  
450 procedure, and subsequently singly housed after the implant surgery. All experimental  
451 procedures and animal husbandry were approved by the NIH Institutional Animal Care  
452 and Use Committee (IACUC) and complied with Public Health Service policy on the  
453 humane care and use of laboratory animals.

454

### 455 Stereotaxic surgery

456 Each mouse was implanted with a head-holder before behavioral training; the  
457 procedure was similar to that in our previous studies<sup>13</sup>. During the surgery, animals  
458 were anesthetized with isoflurane (4% induction, 0.8-1.5% maintenance) and secured  
459 by a stereotaxic frame with ear bars (Kopf Instruments, CA). Dexamethasone (1.6  
460 mg/kg) was administered to reduce inflammation. A feedback-controlled heating pad  
461 (PhysioSuite, Kent Scientific, CT) was used to maintain the body temperature at 37°C,  
462 and artificial tears were applied to the eyes to prevent them from drying. After the  
463 animal's head was leveled in the stereotaxic frame, a scalp incision was made along the  
464 midline. A custom-designed titanium head post for head-fixing was positioned and

465 secured to the skull using Metabond (Parkell Inc., NY). The skin wound edge was then  
466 closed with sutures or tissue adhesive (Vetbond, 3M, MN). After surgery, mice received  
467 subcutaneous ketoprofen (1.85mg/kg) daily for up to three days to alleviate any  
468 potential discomfort.

469         After each mouse was trained on the detection task for 20-30 days, a second  
470 surgery for implanting microwire bundles was carried out. Anesthesia procedure was  
471 identical to the first head-post surgery. After the animal's head was leveled in the  
472 stereotaxic frame, a small craniotomy was made for implanting with moveable custom  
473 16-wire microwire bundles (Innovative Neurophysiology, NC). The coordinates for the  
474 tips of stainless steel cannula of the microwire bundles were  $\pm 0.8\sim 1.1$  mm from midline  
475 (M-L axis),  $-3.65\sim -4.0$  mm from Bregma (A-P axis) and 0.2-0.5 mm ventral (D-V axis),  
476 based on a standard mouse brain atlas<sup>63</sup>. The cranial opening was sealed with bone  
477 wax and the microwire bundle assembly was secured on the skull with Metabond. Mice  
478 again received post-surgery subcutaneous ketoprofen (1.85mg/kg) as needed to  
479 alleviate potential discomfort.

480

#### 481 Food control

482 After mice recovered from surgery and returned to above 95% of their pre-surgery  
483 weight (typically within 7-9 days), they were placed on a food control schedule. Mice  
484 had free access to water, but their intake of dry food was controlled, and they were  
485 allowed to augment their dietary intake by access to a nutritionally complete 8% soy-  
486 based infant formula (Similac, Abbott, IL). Overall food intake was regulated to maintain  
487 at least 85% of their free-feeding body weight, and the health status of each mouse was

488 monitored daily throughout the study. Mice were initially acclimatized to handling  
489 procedures by having their heads gently restrained while receiving the soy-based fluid  
490 under manual control via a sipper tube. After the initial exposure to soy-based fluid, the  
491 animal was more securely head-fixed, and manual delivery was continued. Once mice  
492 were adapted to these procedures, we switched to automatic delivery of fluid under  
493 computer control in the behavioral apparatus.

494

#### 495 Behavioral apparatus

496 The behavioral apparatus consisted of a custom-built booth that displayed visual stimuli  
497 to the mouse, the updating of the display was coupled to their locomotion. Details of  
498 apparatus construction are described elsewhere<sup>64</sup>. The mouse was head-fixed in the  
499 center of the apparatus, positioned atop a polystyrene foam wheel (20-cm diameter)  
500 that allowed natural walking or running movements along a linear path. An optical  
501 encoder (Kübler, Germany) was used to measure the rotation of the wheel. The front  
502 walls of the booth incorporated a pair of LCD displays (VG2439, ViewSonic, CA)  
503 positioned at 45° angles from the animal's midline such that each display was centered  
504 on either the right or left eye and subtended ~90° horizontal by ~55° vertical of the  
505 visual hemifield, at a viewing distance of 27.5 cm. The interior of the booth was lined  
506 with sound absorbing material to reduce acoustic noise. The entire apparatus rested on  
507 a vibration isolation air table (Newport, CA). The experiments were controlled by a  
508 computer using a modified version of the PLDAPS system<sup>65</sup>. Our system omitted the  
509 Plexon device, but included a Datapixx peripheral (Vpixx Technologies, Canada) and  
510 the Psychophysics Toolbox extensions<sup>66,67</sup> for Matlab (The Mathworks, MA), controlled



511 by Matlab-based routines run on a Mac Pro (Apple Inc, CA). The Datapixx device  
512 provided autonomous timing control of analog and digital inputs and outputs and  
513 synchronized the display of visual stimuli. A reward delivery spout was positioned near  
514 the snout of the mouse; lick contacts with the spout were detected by a piezo sensor  
515 (Mide Technology Co., MA) and custom electronics. Each reward was a small volume  
516 (5-10  $\mu$ l) of an 8% solution of soy-based infant formula (Similac, Abbott, IL) delivered by  
517 a peristaltic pump (Harvard Apparatus, MA) under computer and Datapixx control. The  
518 temperature inside the apparatus was maintained in a temperature range of 70-80° F.

519

#### 520 Visual detection tasks with spatial cueing

521 The tasks were similar to those we used previously<sup>13,64</sup>. Experiments were organized in  
522 blocks of randomly shuffled, interleaved trials, and each trial consisted of a sequence of  
523 epochs that the mouse progressed through by walking or running forwards on the  
524 wheel. Each epoch was defined by the particular stimuli presented on the visual  
525 displays, and the duration of each epoch was determined by the time required for the  
526 mouse to travel a randomized distance on the wheel. A typical trial lasted several  
527 seconds.

528 Each trial followed a standard sequence of four epochs. The average luminance  
529 across each visual display in all epochs was 4-8 cd/m<sup>2</sup>. In the first epoch (“noise”, not  
530 shown), the uniform gray of the inter-trial interval was replaced by pink noise with an  
531 RMS contrast of 3.3%; this epoch was presented for a wheel distance of 10 - 20 cm  
532 (range of time: 0.2 - 0.3 s). In the second epoch (“cue”), on cued trials a vertically  
533 oriented Gabor patch was added to the pink noise, centered in either the left or right

534 visual display. The Gabor patch consisted of a sinusoidal grating (95% Michelson  
535 contrast) with a spatial frequency of 0.1 cycles per degree, a value chosen based on the  
536 visual spatial acuity of mice, modulated by a Gaussian envelope with full width at half-  
537 maximum of  $18^\circ$  ( $\sigma = 7.5^\circ$ ). The phase of the grating was not fixed, but throughout the  
538 trial was incremented in proportion to the wheel rotation with every monitor refresh, so  
539 that the sinusoidal pattern was translated within the patch by approximately the same  
540 distance that the mouse traveled on the wheel; the Gabor patch on the left (right) drifted  
541 leftward (rightward), consistent with optic flow during locomotion. This second epoch  
542 lasted for 46-92 cm (0.36-1.55 s). On no-cue trials, no Gabor was added during the  
543 second epoch, but the otherwise the timing was the same. In the third epoch (“2 patch”),  
544 a second Gabor patch with the same spatial frequency and orientation appeared on the  
545 other side of the visual display; this epoch lasted for 107 - 214 cm (0.84 - 3.6 s). On no-  
546 cue trials, both Gabor patches appeared simultaneously in 2-patch epoch. The visual  
547 stimuli in the fourth epoch (“change”) depended on whether or not the trial included an  
548 orientation change. If the trial did include an orientation change, the cued Gabor patch  
549 changed orientation at the onset of the visual-event epoch; in no-cue trials, either one of  
550 the two Gabor patches changed its orientation with equal frequency. The amplitude of  
551 the orientation change was always  $9^\circ$ , which was near the detection threshold of mice. If  
552 the trial did not contain an orientation change, the two Gabor patches did not change  
553 their orientation, so that the “change” epoch unfolded as a seamless extension of the  
554 previous 2-patch epoch. Thus, in every experiment, the cue was always 100% valid, but  
555 an equal number of change and no-change trials were interleaved, making the  
556 probability of a change on any given trial 50% from the perspective of the subject.

557           The task of the mouse was to lick the spout when he or she detected a change in  
558 the orientation of the Gabor patch and to otherwise withhold from licking. Mice were  
559 required to lick within a 500-ms response window starting 300 ms after the orientation  
560 change in order to score a “hit” and receive a fluid reward. Any lick before the response  
561 window would result in trial abort and timeout penalty. If the mouse failed to lick within  
562 the response window after an orientation change, the trial was scored as a “miss” and  
563 no reward was given but no other penalty was applied. On “no change” trials, if the  
564 mouse licked within the same response window aligned on the unmarked transition to  
565 the fourth epoch, the trial was scored as a “false alarm”, which led to timeouts; if they  
566 correctly withheld from licking throughout the entire “change” epoch, the trial was scored  
567 as a “correct reject”. At the end of correct reject trials, the trial was extended to include  
568 an additional “safety-net epoch” in which the cued Gabor patch underwent a supra-  
569 threshold (30°) orientation change and the mouse could receive a reward by licking  
570 within a comparable response window. Responses in the safety-net epoch were not  
571 used for any analysis in the study.

572           Both variants of spatial cueing task experiments were organized as blocks of  
573 trials, with the sub-block conditions defined based on our recording site in the SC. In the  
574 “contra/ipsi cue” task variant, each block contained 80 trials, subdivided into 40  
575 contralateral-cue trials (i.e., contralateral to our recording site in the SC), 40 ipsilateral-  
576 cue trials. The 40 contralateral-cue and 40 ipsilateral-cue trials were run back-to-back,  
577 with the order of the two sub-blocks randomly determined at the beginning of each  
578 single session. In the “cue/no-cue” task variant, each block contained 160 trials,  
579 subdivided into 40 contralateral-cue trials, 40 ipsilateral-cue trials, and 80 no-cue trials.

580 The 40 contralateral-cue and 40 ipsilateral-cue trials were also run back-to-back, with  
581 the order of the two sub-blocks randomly determined in a given session. The sub-block  
582 of 80 no-cue trials were run either before or after the 80 (i.e., 40 plus 40) cue trials with  
583 equal probability. Of all trial types, 50% were with orientation change, randomly  
584 interleaved with no change trials. During a daily session, mice typically completed 320 -  
585 800 trials in total.

586

### 587 Electrophysiological recording

588 Spiking activity of SC neurons was recorded in four C57BL/6J mice (2 males, 2  
589 females) implanted with moveable 16-wire microwire bundles (Innovative  
590 Neurophysiology, NC). Electrophysiological signals were acquired through an RZ5D  
591 processor and Synapse Suite interface (Tucker-Davis Technologies, FL) with voltages  
592 band-pass filtered (0.3 to 7 kHz) and sampled at 25k Hz. The bundles were lowered  
593 along the dorsal-ventral axis with a microdrive included as part of the bundle assembly.  
594 Single units were sorted offline using KiloSort<sup>68</sup>. The SC surface was identified as the  
595 depth at which visual responses were first encountered while advancing the microwire  
596 bundle. All single unit data were collected from depths within 2mm from the estimated  
597 SC surface. Only units identified at least 400um below the SC surface were included for  
598 further analysis in the current study.

599 Firing rates of individual neurons were represented as peristimulus time  
600 histograms (PSTHs), using 20 ms non-overlapping bins aligned to the onset of task  
601 epochs. Normalization of spike rates for each neuron was done by subtracting the mean  
602 spike count from the PSTH and dividing by the standard deviation, using the mean and

603 standard deviation of spike counts calculated from 20 ms bins across the entire  
604 recording session. The calculation of interneuronal spike-count correlations followed  
605 previously described procedures<sup>23</sup>. Briefly, correlations were measured from  
606 simultaneously isolated pairs of single units with mean spike rates of at least 5  
607 spikes/second. The Pearson correlation was computed for spike counts across trials  
608 measured during the final 200 ms of the 2-patch epoch (“delay period”).

609

#### 610 Mapping of visual receptive fields

611 SC units were further sub-selected based on having visual receptive fields that  
612 overlapped with the Gabor patch. Each visual attention task session was followed by a  
613 receptive field mapping session, during which white circular disks (118.5 cd/m<sup>2</sup>) of 10°  
614 in diameter were flashed against a gray background (7.2 cd/m<sup>2</sup>) in the visual display  
615 contralateral to the recording side. We sampled visual locations pseudo-randomly  
616 drawn from a 3 x 7 isotropic grid that extended from -25° to 25° in elevation and 0° to  
617 90° in azimuth of the contralateral visual field. An individual trial consisted of 8  
618 consecutive 250 ms flashes, with each flash followed by a 250 ms blank period. At least  
619 15 flash repetitions at each grid location were presented in each mapping session.

620       Receptive fields of individual neurons were estimated from the mean spike  
621 counts 50-ms to 150-ms after flash onset in each grid location, after subtracting  
622 baseline activity. The baseline in each trial was defined as the mean spike count within  
623 the 100-ms period before the presentation of the first flash. Baseline-subtracted mean  
624 spike counts were normalized by dividing by the maximum value evoked across grid  
625 locations. Normalized counts were linearly interpolated between grid locations with 1°

626 resolution using the *scatteredInterpolant* function in Matlab and smoothed with a 2D  
627 Gaussian kernel ( $\sigma_x = \sigma_y = 5^\circ$ ); we defined the receptive field boundary as the isocline at  
628 50% of the maximum value of the smoothed, interpolated normalized counts. The area  
629 of intersection ( $S_i$ ) between the receptive field ( $S_r$ ) and the Gabor patch ( $S_g$ ) was used to  
630 calculate an overlap ratio ( $R$ ), defined as  $R = ((S_i / S_r)^2 + (S_i / S_g)^2)^{1/2}$ . Only units with  
631  $R > 0.25$  were used for further analysis.

632

### 633 Monitoring mouse eye movements and pupil size

634 A high speed, 240 Hz CCD camera (ISCAN, MA) was used to monitor eye position and  
635 pupil size of head-fixed mice during the entirety of the electrophysiology experiments.  
636 We imaged an area of 1.5 mm x 3 mm with a macro lens (ISCAN, MA) centered on the  
637 eye. Four infrared light-emitting-diodes (wavelength 940 nm) were used to illuminate the  
638 eye. Commercially available acquisition software (ETL-200, ISCAN) was used to  
639 determine the center and boundary of the pupil. Eye position was obtained by  
640 subtracting the center of corneal reflection from the pupil center to compensate any  
641 translational movement of the eye in the imaging plane. The pupil displacement in 2-D  
642 image was converted to a rotation angle based on estimated eyeball radius (1.25mm)  
643 from model C57bl/6 mice<sup>69</sup>.

644

### 645 Experimental design and statistical analysis

646 Data were obtained from a total number of four C57BL/6J mice in the study, two were  
647 male and two were females. We did not observe any systematic difference in behavioral  
648 performance between genders in this study.

649 To verify the behavioral cueing effect, we tabulated hit and false alarm rates  
650 based on the definitions of trial outcomes described for the behavioral tasks, separately  
651 for each behavioral session. Performance was then characterized by measuring  
652 sensitivity ( $d'$ ) and criterion using methods from signal detection theory<sup>70</sup>, as follows:  $d'$   
653 =  $\Phi^{-1}(H) - \Phi^{-1}(F)$ , criterion =  $-(\Phi^{-1}(H) + \Phi^{-1}(F))/2$ , where  $\Phi^{-1}$  is the inverse of the  
654 Gaussian cumulative distribution function, H is the hit rate and F is the false alarm rate.  
655 The 95% confidence intervals (CIs) of hit and false alarm rates were computed with the  
656 *binofit* function in Matlab, which uses the Clopper-Pearson method. The 95% CIs on  $d'$   
657 and criterion were computed with bootstrapped resampling.

658 The time course of each neuron's cue-related modulation was computed from  
659 spike counts in non-overlapping 20 ms bins (aligned on specific epochs). For each unit,  
660 the area under the receiver operating characteristic curve (auROC) was calculated  
661 between spike counts in each bin for "contra-cue" trials and counts for "ipsi-cue" trials,  
662 following methods described previously<sup>6</sup>.

663 For the cue-related modulation during the "delay-period", spike counts from a  
664 200-ms bin aligned on the onset of change epoch from each trial were used in two  
665 different ways. First, we computed auROC values for each neuron as described above.  
666 A bootstrapping procedure was used to compute the 95% CIs of the delay-period  
667 auROC, and if the CI was completely above or below 0.5, the unit was considered  
668 significantly modulated. Second, we computed an attention modulation index (AMI) for  
669 each unit from mean spike counts in contra-cue trials ( $Count_{contra}$ ) and ipsi-cue trials  
670 ( $Count_{ipsi}$ ) in the 200 ms epoch:  $AMI = (Count_{contra} - Count_{ipsi}) / (Count_{contra} + Count_{ipsi})$ .  
671 Nonparametric rank sum tests were performed for each unit to compare spike counts in

672 each 200 ms bin between contra-cue and ipsi-cue trials; a unit with  $p < 0.05$  was  
673 considered to have a significant AMI.

674 For the visual change-related activity, we performed the same analyses on the  
675 spike counts in the interval 60 - 210 ms after the change in orientation of the Gabor  
676 patch, computing auROC values for each neuron by comparing spike counts across trial  
677 conditions indicated in the main text (Fig. 4). Confidence intervals and associated  
678 statistical significance were again determined using a bootstrapping procedure.

679 For the linear regression analysis of factors contributing to spike rate variability  
680 (Fig. S2), we used Matlab function *fitlm* to model the observed spike rates in each  
681 neuron using three predictors: cue location, running speed and pupil size. We  
682 discretized running speed and pupil size, making them categorical variables.  
683 Normalized spike rate (z-scored) in four 200 ms intervals were modeled. Cue: from cue  
684 onset; early 2-patch: from 2-patch onset; mid 2-patch: from 250 ms after; delay: final  
685 200 ms of 2-patch. Coefficients from the model fits represent the weights from each  
686 predictor that best explained the spike rate variability. The p value for testing the null  
687 hypothesis whether a predictor's coefficient was equal to zero came from *t-statistic* for  
688 the model fit of individual unit, the degrees of freedom depended on trial counts from  
689 each recording session, between 300-800. *Post hoc* multiple comparisons with Tukey-  
690 Kramer correction after one-way ANOVA (degrees of freedom for groups: 2; degrees of  
691 freedom for errors, 930;  $F = 27.07$ ) were used to assess the differences of predictor  
692 coefficient values during the delay period.

693 Statistical analyses were conducted in Matlab using the statistics and machine  
694 learning toolbox, and statistical significance was defined as  $p < 0.05$  unless otherwise



695 noted. Nonparametric rank-sum tests were computed using spike counts from -200ms  
696 to 0 ms before cue epoch onset between contralateral and ipsilateral trials to determine  
697 whether a unit display significant spatial modulation before the presence of the spatial  
698 cue. We used spike counts from four different time windows in the detection task to  
699 determine whether a unit had significant response to the onset of visual epochs: base (-  
700 100 ms to 0 ms from cue onset), cue (+50 ms to +150 ms from cue onset), late-2 (-100  
701 ms to 0 ms from change onset), change (+50 ms to +150 ms from change onset).  
702 Nonparametric rank-sum tests were computed using spike rates in base and cue  
703 windows to determine whether a unit had a significant response to the cue.  
704 Nonparametric rank-sum tests were computed using spike rates in the late-2 and  
705 change windows to determine whether a unit had significant responses to the visual  
706 change. One-tailed nonparametric Wilcoxon signed-rank tests were performed to  
707 determine whether the distributions of population auROC values had medians  
708 significantly larger than 0.5, and whether the distributions of population AMI had  
709 medians significantly larger than 0. Paired-sample nonparametric Wilcoxon signed-rank  
710 tests were performed to compare the effect of spatial cueing on behavioral  $d'$  and  
711 criterion across sessions.  $\chi$ -square tests were performed to compare proportions of  
712 units with significant change-related auROC values across different cueing conditions.  
713 Paired-sample nonparametric Wilcoxon signed-rank tests were performed to compare  
714 the effect of spatial-cue locations on interneuronal spike count correlations across the  
715 population. The value of  $n$  reported in the figures and results indicates the number of  
716 units or unit-pairs. Error bars in figures indicate 95% CI on the median or mean, unless  
717 indicated otherwise.

718

719 **Data Availability**

720 All of the data were acquired and initially processed using custom scripts written in

721 Matlab (The Mathworks, MA). The Matlab code and datasets that support the findings of

722 this study will be made available from the corresponding author upon reasonable

723 request.

724

725

726

## 727 References

- 728 1. Desimone, R. & Duncan, J. Neural mechanisms of selective visual attention.  
729 *Annu. Rev. Neurosci.* **18**, 193–222 (1995).
- 730 2. Squire, R. F., Noudoost, B., Schafer, R. J. & Moore, T. Prefrontal contributions to  
731 visual selective attention. *Annu. Rev. Neurosci.* **36**, 451–466 (2013).
- 732 3. Bisley, J. W. & Goldberg, M. E. Attention, Intention, and Priority in the Parietal  
733 Lobe. *Annu. Rev. Neurosci.* **33**, 1–21 (2010).
- 734 4. Reynolds, J. H. & Chelazzi, L. *Attentional modulation of visual processing. Annual*  
735 *Review of Neuroscience* **27**, 611–647 (2004).
- 736 5. Cohen, M. R. & Maunsell, J. H. R. Attention improves performance primarily by  
737 reducing interneuronal correlations. *Nat Neurosci* **12**, 1594–1600 (2009).
- 738 6. Herman, J. P. & Krauzlis, R. J. Color-Change Detection Activity in the Primate  
739 Superior Colliculus. *eNeuro* **4**, ENEURO.0046–17.2017 (2017).
- 740 7. Briggs, F., Mangun, G. R. & Usrey, W. M. Attention enhances synaptic efficacy  
741 and the signal-to-noise ratio in neural circuits. *Nature* **499**, 476–480 (2013).
- 742 8. McAlonan, K., Cavanaugh, J. & Wurtz, R. H. Guarding the gateway to cortex with  
743 attention in visual thalamus. *Nature* **456**, 391–394 (2008).
- 744 9. Arcizet, F. & Krauzlis, R. J. Covert spatial selection in primate basal ganglia.  
745 *PLoS Biol* **16**, e2005930–28 (2018).
- 746 10. Krauzlis, R. J., Lovejoy, L. P. & Zénon, A. Superior Colliculus and Visual Spatial  
747 Attention. *Annu. Rev. Neurosci.* **36**, 165–182 (2013).
- 748 11. Snow, J. C., Allen, H. A., Rafal, R. D. & Humphreys, G. W. Impaired attentional  
749 selection following lesions to human pulvinar: evidence for homology between  
750 human and monkey. *Proc. Natl. Acad. Sci. U.S.A.* **106**, 4054–4059 (2009).
- 751 12. Lovejoy, L. P. & Krauzlis, R. J. Inactivation of primate superior colliculus impairs  
752 covert selection of signals for perceptual judgments. *Nature Neuroscience* **13**,  
753 261–266 (2010).
- 754 13. Wang, L. & Krauzlis, R. J. Visual Selective Attention in Mice. *CURR BIOL* **28**,  
755 676–685.e4 (2018).
- 756 14. Speed, A., Del Rosario, J., Mikail, N. & Haider, B. Spatial attention enhances  
757 network, cellular and subthreshold responses in mouse visual cortex. *Nat Comms*  
758 **11**, 505–11 (2020).
- 759 15. You, W.-K. & Mysore, S. P. Endogenous and exogenous control of visuospatial  
760 selective attention in freely behaving mice. *Nat Comms* 1–14 (2020).  
761 doi:10.1038/s41467-020-15909-2
- 762 16. Wang, L. & Krauzlis, R. J. Involvement of Striatal Direct Pathway in Visual Spatial  
763 Attention in Mice. *CURR BIOL* 1–12 (2020). doi:10.1016/j.cub.2020.08.083
- 764 17. Mysore, S. P. & Knudsen, E. I. The role of a midbrain network in competitive  
765 stimulus selection. *Current Opinion in Neurobiology* **21**, 653–660 (2011).
- 766 18. Ito, S. & Feldheim, D. A. The Mouse Superior Colliculus: An Emerging Model for  
767 Studying Circuit Formation and Function. *Frontiers in Neural Circuits* **12**, 219–11  
768 (2018).
- 769 19. Wang, L., McAlonan, K., Goldstein, S., Gerfen, C. R. & Krauzlis, R. J. A Causal  
770 Role for Mouse Superior Colliculus in Visual Perceptual Decision-Making. *J.*  
771 *Neurosci.* **40**, 3768–3782 (2020).

- 772 20. Lee, K. H., Tran, A., Turan, Z. & Meister, M. The sifting of visual information in the  
773 superior colliculus. *eLife* **9**, 1911–23 (2020).
- 774 21. Wang, L., Rangarajan, K. V., Gerfen, C. R. & Krauzlis, R. J. Activation of Striatal  
775 Neurons Causes a Perceptual Decision Bias during Visual Change Detection in  
776 Mice. *Neuron* **97**, 1369–1381.e5 (2018).
- 777 22. Green, D. M. & Swets, J. A. *Signal Detection Theory and Psychophysics*. (Wiley &  
778 Sons, Inc, 1966).
- 779 23. Mitchell, J. F., Sundberg, K. A. & Reynolds, J. H. Spatial Attention Decorrelates  
780 Intrinsic Activity Fluctuations in Macaque Area V4. *Neuron* **63**, 879–888 (2009).
- 781 24. Savier, E. L., Chen, H. & Cang, J. Effects of Locomotion on Visual Responses in  
782 the Mouse Superior Colliculus. *Journal of Neuroscience* **39**, 9360–9368 (2019).
- 783 25. Schröder, S. *et al.* Arousal Modulates Retinal Output. *Neuron* **107**, 487–495.e9  
784 (2020).
- 785 26. Reynolds, J. H. & Heeger, D. J. The Normalization Model of Attention. *Neuron* **61**,  
786 168–185 (2009).
- 787 27. Herman, J. P., Katz, L. N. & Krauzlis, R. J. Midbrain activity can explain  
788 perceptual decisions during an attention task. *Nature Neuroscience* 1651–1660  
789 (2018). doi:10.1038/s41593-018-0271-5
- 790 28. Egeth, H. E. & Yantis, S. Visual attention: control, representation, and time  
791 course. *Annu Rev Psychol* **48**, 269–297 (1997).
- 792 29. Knudsen, E. I. Fundamental Components of Attention. *Annu. Rev. Neurosci.* **30**,  
793 57–78 (2007).
- 794 30. Dräger, U. C. & Hubel, D. H. Topography of visual and somatosensory projections  
795 to mouse superior colliculus. *Journal of Neurophysiology* **39**, 91–101 (1976).
- 796 31. Nummela, S. U. & Krauzlis, R. J. Inactivation of Primate Superior Colliculus  
797 Biases Target Choice for Smooth Pursuit, Saccades, and Button Press  
798 Responses. *Journal of Neurophysiology* **104**, 1538–1548 (2010).
- 799 32. Krauzlis, R. J., Bogadhi, A. R., Herman, J. P. & Bollimunta, A. Selective attention  
800 without a neocortex. *CORTEX* **102**, 161–175 (2018).
- 801 33. Knudsen, E. I. Evolution of neural processing for visual perception in vertebrates.  
802 *J. Comp. Neurol.* **528**, 2888–2901 (2020).
- 803 34. McPeck, R. M. & Keller, E. Saccade target selection in the superior colliculus  
804 during a visual search task. *Journal of Neurophysiology* **88**, 2019–2034 (2002).
- 805 35. Krauzlis, R. & Dill, N. Neural correlates of target choice for pursuit and saccades  
806 in the primate superior colliculus. *Neuron* **35**, 355–363 (2002).
- 807 36. Ignashchenkova, A., Dicke, P. W., Haarmeier, T. & Thier, P. Neuron-specific  
808 contribution of the superior colliculus to overt and covert shifts of attention. *Nat*  
809 *Neurosci* **7**, 56–64 (2004).
- 810 37. McPeck, R. M. & Keller, E. L. Deficits in saccade target selection after inactivation  
811 of superior colliculus. *Nat Neurosci* **7**, 757–763 (2004).
- 812 38. Carello, C. D. & Krauzlis, R. J. Manipulating intent: evidence for a causal role of  
813 the superior colliculus in target selection. *Neuron* **43**, 575–583 (2004).
- 814 39. Mysore, S. P. & Knudsen, E. I. A shared inhibitory circuit for both exogenous and  
815 endogenous control of stimulus selection. *Nature Neuroscience* **16**, 473–478  
816 (2013).

- 817 40. Martinez-Trujillo, J. C. & Treue, S. Feature-Based Attention Increases the  
818 Selectivity of Population Responses in Primate Visual Cortex. *CURR BIOL* **14**,  
819 744–751 (2004).
- 820 41. Womelsdorf, T., Anton-Erxleben, K., Pieper, F. & Treue, S. Dynamic shifts of  
821 visual receptive fields in cortical area MT by spatial attention. *Nat Neurosci* **9**,  
822 1156–1160 (2006).
- 823 42. Maunsell, J. H. R. Neuronal Mechanisms of Visual Attention. *Annu. Rev. Vis. Sci.*  
824 **1**, 373–391 (2015).
- 825 43. Wang, L., Sarnaik, R., Rangarajan, K., Liu, X. & Cang, J. Visual receptive field  
826 properties of neurons in the superficial superior colliculus of the mouse. *J.*  
827 *Neurosci.* **30**, 16573–16584 (2010).
- 828 44. Boehnke, S. E. & Munoz, D. P. On the importance of the transient visual response  
829 in the superior colliculus. *Current Opinion in Neurobiology* **18**, 544–551 (2008).
- 830 45. Fernandes, A. M. *et al.* Neural circuitry for stimulus selection in the zebrafish  
831 visual system. *Neuron* (2020). doi:10.1016/j.neuron.2020.12.002
- 832 46. Mysore, S. P. & Knudsen, E. I. Flexible Categorization of Relative Stimulus  
833 Strength by the Optic Tectum. *Journal of Neuroscience* **31**, 7745–7752 (2011).
- 834 47. Eckstein, M. P., Peterson, M. F., Pham, B. T. & Droll, J. A. Statistical decision  
835 theory to relate neurons to behavior in the study of covert visual attention. *Vision*  
836 *Research* **49**, 1097–1128 (2009).
- 837 48. Nienborg, H., R Cohen, M. & Cumming, B. G. Decision-Related Activity in  
838 Sensory Neurons: Correlations Among Neurons and with Behavior. *Annu. Rev.*  
839 *Neurosci.* **35**, 463–483 (2012).
- 840 49. Ruff, D. A., Ni, A. M. & Cohen, M. R. Cognition as a Window into Neuronal  
841 Population Space. *Annu. Rev. Neurosci.* **41**, 77–97 (2018).
- 842 50. Kohn, A., Coen-Cagli, R., Kanitscheider, I. & Pouget, A. Correlations and  
843 Neuronal Population Information. *Annu. Rev. Neurosci.* **39**, 237–256 (2016).
- 844 51. Tremblay, S., Pieper, F., Sachs, A. & Martinez-Trujillo, J. Attentional Filtering of  
845 Visual Information by Neuronal Ensembles in the Primate Lateral Prefrontal  
846 Cortex. *Neuron* **85**, 202–215 (2015).
- 847 52. Bartolo, R., Saunders, R. C., Mitz, A. R. & Averbeck, B. B. Information-Limiting  
848 Correlations in Large Neural Populations. *Journal of Neuroscience* **40**, 1668–1678  
849 (2020).
- 850 53. Ellis, E. M., Gauvain, G., Sivyer, B. & Murphy, G. J. Shared and distinct retinal  
851 input to the mouse superior colliculus and dorsal lateral geniculate nucleus.  
852 *Journal of Neurophysiology* **116**, 602–610 (2016).
- 853 54. Beltramo, R. & Scanziani, M. A collicular visual cortex: Neocortical space for an  
854 ancient midbrain visual structure. *Science* **363**, 64–69 (2019).
- 855 55. Ahmadlou, M., Zweifel, L. S. & Heimel, J. A. Functional modulation of primary  
856 visual cortex by the superior colliculus in the mouse. *Nat Comms* **9**, 1–13 (2018).
- 857 56. Hu, F. *et al.* Prefrontal Corticotectal Neurons Enhance Visual Processing through  
858 the Superior Colliculus and Pulvinar Thalamus. *Neuron* **104**, 1141–1152.e4  
859 (2019).
- 860 57. Tohmi, M., Meguro, R., Tsukano, H., Hishida, R. & Shibuki, K. The  
861 Extrageniculate Visual Pathway Generates Distinct Response Properties in the  
862 Higher Visual Areas of Mice. *CURR BIOL* **24**, 587–597 (2014).

- 863 58. Desimone, R. Visual attention mediated by biased competition in extrastriate  
864 visual cortex. *Philos Trans R Soc Lond B Biol Sci* **353**, 1245–1255 (1998).
- 865 59. Beck, D. M. & Kastner, S. Stimulus context modulates competition in human  
866 extrastriate cortex. *Nat Neurosci* **8**, 1110–1116 (2005).
- 867 60. Zénon, A. & Krauzlis, R. J. Attention deficits without cortical neuronal deficits.  
868 *Nature* **489**, 434–437 (2012).
- 869 61. Krauzlis, R. J., Bollimunta, A., Arcizet, F. & Wang, L. Attention as an effect not a  
870 cause. *Trends in Cognitive Sciences* **18**, 457–464 (2014).
- 871 62. Herman, J. P., Arcizet, F. & Krauzlis, R. J. Attention-related modulation of caudate  
872 neurons depends on superior colliculus activity. *eLife* **9**, 357–26 (2020).
- 873 63. Paxinos, G. & Franklin, K. *Paxinos and Franklin's the mouse brain in stereotaxic  
874 coordinates*. (2019).
- 875 64. Krauzlis, R. J. *et al.* Visual Psychophysics in Head-Fixed Mice. *Current Protocols  
876 in Neuroscience* **92**, 3 (2020).
- 877 65. Eastman, K. M. & Huk, A. C. PLDAPS: a hardware architecture and software  
878 toolbox for neurophysiology requiring complex visual stimuli and online behavioral  
879 control. *Frontiers in Neuroinformatics* **6**, 1–11 (2012).
- 880 66. Brainard, D. H. The Psychophysics Toolbox. *Spatial Vision* **10**, 433–436 (1997).
- 881 67. Pelli, D. G. The VideoToolbox software for visual psychophysics: transforming  
882 numbers into movies. *Spatial Vision* **10**, 437–442 (1997).
- 883 68. Pachitariu, M., Steinmetz, N. A., Kadir, S., Carandini, M. & Harris, K. D. Kilosort:  
884 realtime spike-sorting for extracellular electrophysiology with hundreds of  
885 channels. *bioRxiv* 1–9 (2016).
- 886 69. Sakatani, T. & Isa, T. PC-based high-speed video-oculography for measuring  
887 rapid eye movements in mice. *Neuroscience Research* **49**, 123–131 (2004).
- 888 70. Macmillan, N. A. & Creelman, C. D. *Detection Theory: A User's Guide*. (Lawrence  
889 Erlbaum Associates, 2005).
- 890

891



892 **Figure Legends**

893 **Fig. 1. Spatial cue related modulation of mouse SC neuronal activity in a visual**  
894 **change detection task. a)** Schematics of unilateral recording in the mouse SC during  
895 the “contra/ipsi cue” orientation change detection task, and illustration of visual stimuli  
896 on two visual displays in sequences of task epochs: cue, 2 patch and change. **b)** Firing  
897 rates of a sample SC unit aligned on three task epochs, shown as Peristimulus time  
898 histograms (PSTHs) of contra-cue change trials (orange) and ipsi-cue change trials  
899 (blue) in 20-ms bins. Gray horizontal bar indicates lick window from 300 ms to 800 ms  
900 after orientation change. **c)** Normalized population PSTHs aligned on the onset of three  
901 epochs. Plotting conventions as in **b**. Gray area indicates the final 200 ms of the 2-patch  
902 epoch (defined as the delay period). **d)** Time course of population average area under  
903 ROC (auROC) comparing spike counts between contra-cue change and ipsi-cue  
904 change trials aligned on three task epochs in 20-ms bins. The row of gray boxes below  
905 mark bins in which population auROC are significantly  $> 0.5$  chance level, as measured  
906 in one-tailed signed rank tests.

907

908 **Fig. 2. Population summary of cue-related modulation on mouse SC firing rate**  
909 **and interneuronal spike-count correlations. a)** Distribution of delay period activity  
910 auROC comparing contra-cue and ipsi-cue trials; bin width of histograms is 0.05. Dark  
911 bars count units with auROC value significant different from chance level (bootstrapped  
912 95% CI  $\not\subset 0.5$ ). Dashed line indicates chance value of 0.5, solid line indicates population  
913 median (0.53). **b)** Distribution of delay-period AMIs between contralaterally and  
914 ipsilaterally cued trials, using the same conventions as in **a**. Dark bars count units with

915 significant AMI ( $p < 0.05$ , rank sum test of spike count between ipsi-cue and contra-cue  
916 trials). Dashed line indicates chance value of 0, solid line indicates population median  
917 (0.07). **c**) Distribution of delay period interneuronal spike-count correlations during  
918 “contra-cue” trials of simultaneously recorded SC neuronal pairs. Solid line: population  
919 median (0.079). **d**) Distribution of delay period spike-count correlations during “ipsi-cue”  
920 trials. Solid line: population median (0.104). P value is from paired-sample Wilcoxon  
921 signed rank test comparing population medians between “contra-cue” and “ipsi-cue”  
922 trials.

923

924 **Fig. 3. Cue-related modulation resulted from enhanced activity at contralaterally**  
925 **cued spatial locations. a)** Schematic of epochs in “cue/no-cue” task, where no-cue  
926 trials had cue epoch replaced with a noise epoch and orientation change could occur  
927 either left or right with equal frequency. No-cue sub-blocks were interleaved with cued  
928 sub-blocks. **b)** Normalized population PSTHs of SC neurons for contra-cue change  
929 (orange), ipsi-cue change (blue) and no-cue contra change trials (gray), aligned on the  
930 onset of task epochs. Gray area indicates the delay period used for analysis shown in  
931 **d-e**. Gray horizontal bar indicates the 500-ms lick window. **c)** Time course of population  
932 average auROCs comparing “contra-cue” spike counts to “no-cue” change trials (dark),  
933 and comparing “ipsi-cue” to “no-cue” change trials (gray), aligned on three task epochs  
934 in 20 ms bins. Only “no-cue” trials with contralateral orientation change were illustrated.  
935 The row of dark gray boxes below mark bins in which population auROCs for contra-cue  
936 vs no-cue are significantly  $> 0.5$  chance level, as measured in one-tailed signed rank



937 tests; row of light gray boxes below mark bins in which population auROC for ipsi-cue  
938 vs no-cue are significantly  $< 0.5$  chance level. **d)** Distribution of delay period auROCs  
939 comparing “contra-cue” and “no-cue” change trials. Dark bars count units with auROC  
940 values significantly different from chance level (bootstrapped 95% CI  $\not\subset 0.5$ ). Dashed  
941 line indicates chance value of 0.5, solid line with value indicates population median. **e)**  
942 Presentation as in **d**, but for auROCs comparing “ipsi-cue” to “no-cue” trials.

943

944 **Fig. 4. Cue-related modulation enhanced the neuronal detection of the orientation**  
945 **change based on comparing activity between the contralateral and ipsilateral SC.**

946 **a)** Schematic of apparatus and events in “cue/no-cue” task. **b)** Average normalized  
947 population PSTHs of SC neurons during “contra-cue” change trials (orange) and “ipsi-  
948 cue” change trials (blue). Traces are aligned on the change onset. Gray area: 150 ms  
949 change interval (60 – 210 ms after change onset) used to compute auROC comparing  
950 contralateral and ipsilateral change trials. **c)** Distribution of change auROCs in cued  
951 trials. Dark bars are units with auROCs significantly different from chance level. Dashed  
952 line indicates chance value of 0.5, solid line indicates population median (0.62). **d)**  
953 Presentation as in **b** but comparing “no-cue contra” (orange) to “no-cue ipsi” (blue)  
954 change trials. **e)** Presentation as in **c**, but in no-cue trials; (median = 0.57). The p value  
955 indicates comparison of population median between **c** and **e**, two-tailed Wilcoxon  
956 signed rank test.

957

**Fig. 1**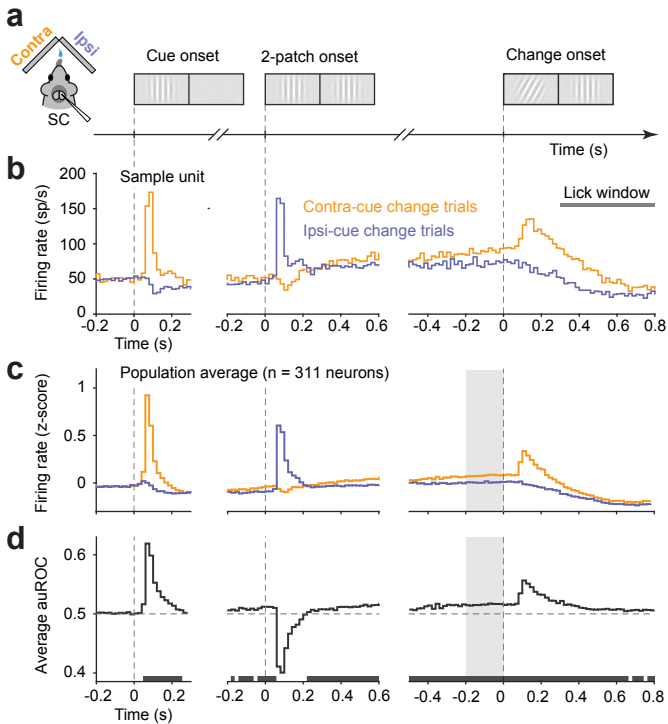

**Fig. 2**

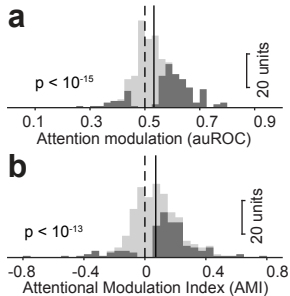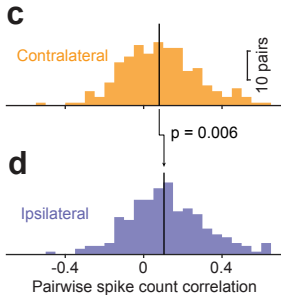

**Fig. 3**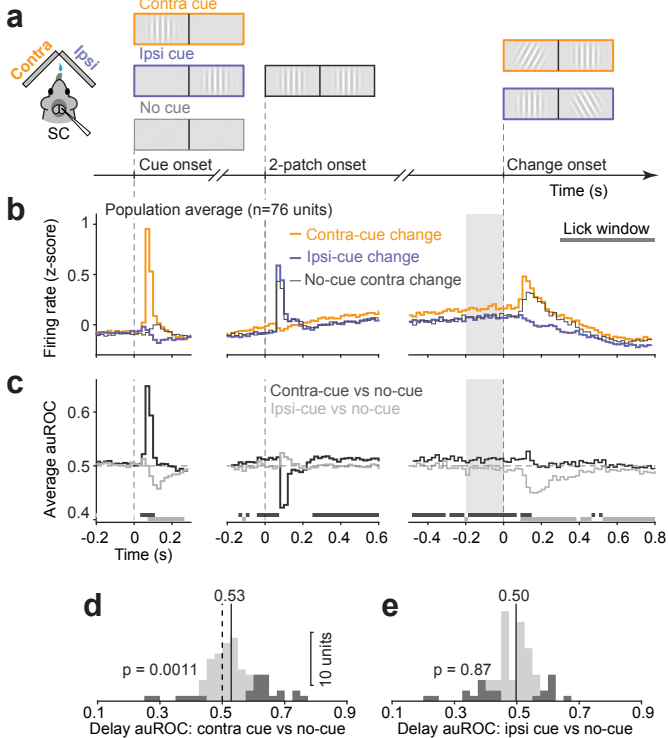

**Fig. 4**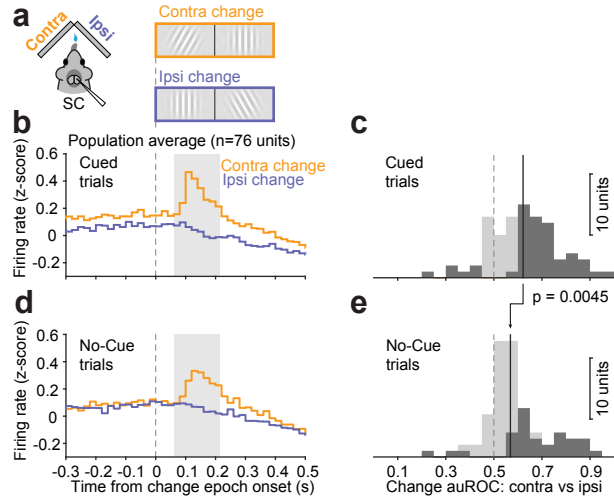

**Fig. S1. Receptive fields of recorded SC neurons.** **a)** Receptive field of sample neuron shown in Fig. 1**b**. Colormap: normalized activity evoked by flashed disks across spatial grids after smoothing with 2D Gaussian kernel ( $\sigma = 5^\circ$ ). Light gray contour line: area with at least 50% of peak activity in the smoothed map; black dashed circle: the location of Gabor patch. **b)** Distribution of receptive field size of mapped SC neurons, defined as area within the 50% contour line. Solid line: population median (971.4 deg<sup>2</sup>). **c)** Scatter plot of receptive field and Gabor patch overlap ratio of individual neurons. X-axis: ratio of overlapped area divided by Gabor patch area; y-axis: ratio of overlapped area divided by receptive field area. Blue dash: radius of 0.25 overlap ratio (R) used as the inclusion criteria. Only units outside the radial arc (dark dots) were used for further analysis in the paper. The larger green dot is the same unit shown in panel **a**.

**Fig. S2. Contribution of running speed, pupil size and cue location on SC activity during the task.** **a)** Mean coefficient of linear regression of cue location (brown), running speed (black) and pupil size (gray) on variability of SC activity during different 200 ms epoch intervals. Cue: from cue onset; early 2-patch: from 2-patch onset; mid 2-patch: from 250ms after; delay: last 200ms of 2-patch. Errorbar: 95% CI. **b)** Similar to **a**, but for percentage of units significantly modulated by different predictors ( $p < 0.01$ , t-statistic to test the null hypothesis whether a predictor coefficient in the regression model is equal to zero for each unit, see Methods). **c)** Distribution of coefficient of cue location on SC activity during delay period. Dark bars are units with coefficient

significantly different from zero. Dashed line indicates null value of 0, solid line indicates population median (0.14). **d**) Presentation as in **c**, but for running speed (median = 0.05). **e**) Presentation as in **c**, but for pupil size (median = 0.02).

Fig. S1

**a** Sample unit smoothed receptive field (same unit as in Figure 1)

$S_l = 645.63 \text{ deg}^2$ ;  $S_r = 865.20 \text{ deg}^2$ ;  $S_g = 706.81 \text{ deg}^2$

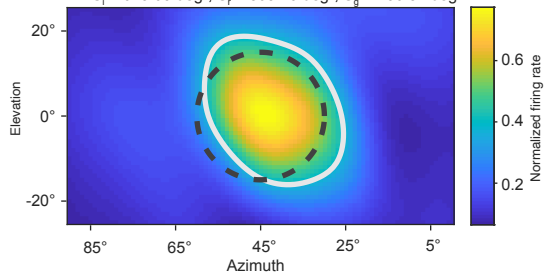

**b**

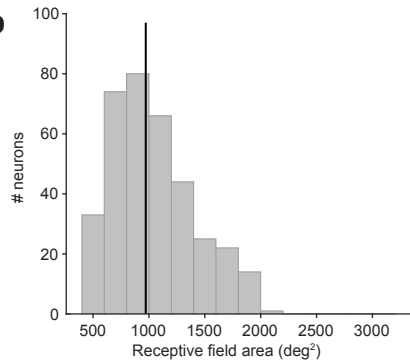

**c**

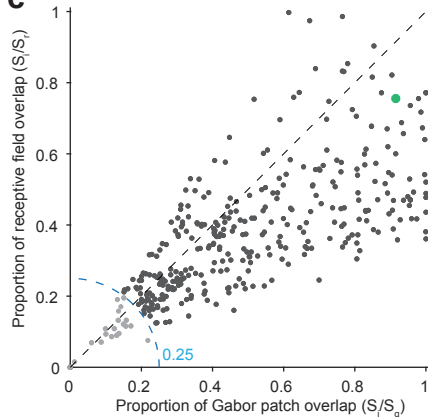



Fig. S2

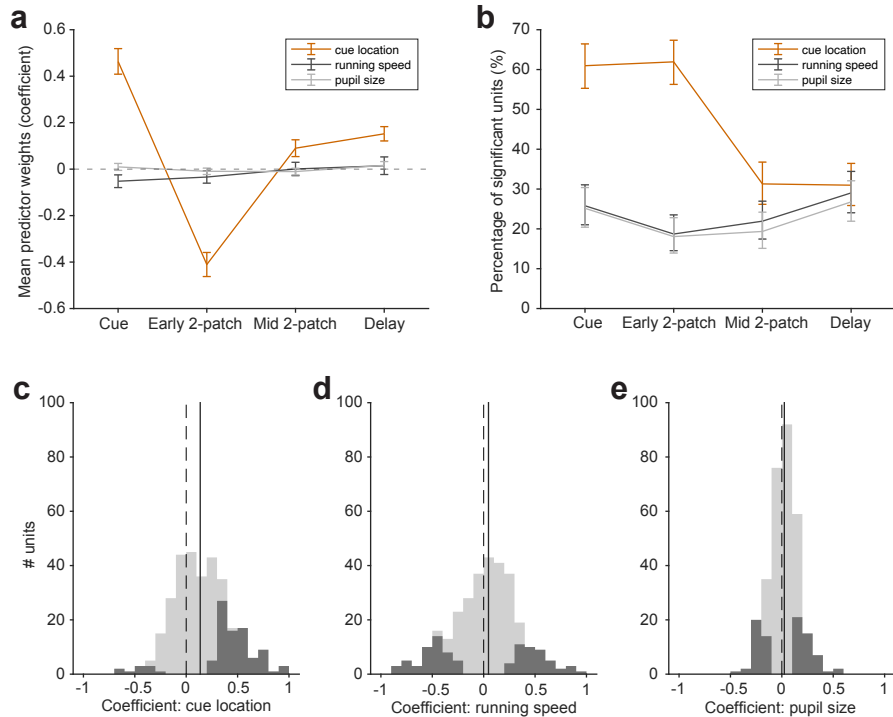

Source: http://biorxiv.org/content/10.1101/2021.02.05.429996v1.full.pdf
